# Supplementary material
Source: ML conference proceedings conference paper supplement (https://openreview.net/forum?id=JCyBN5syv3)
Supplement: supplementary_material [file attachment]

## Sheet: Sheet1
Title	Id	Hour
		120.5
Amsterdam 4K - Morning Drive - Canals & Bicycles	YQMPjBxM-hY	0.7
Amsterdam 4K - Driving Downtown - Sunset Drive	Ve4DvQNnDDQ	1
Madrid 4K - Night Drive - Spain	6CadnBQGLdE	0.8
Brussels 4K - Driving Downtown - Europe's Washington DC	TDWjujb2Tjo	1
Madrid 4K - Driving Downtown - Spain	C911U_Fo-QU	1.1
Miami Beach 4K - Driving Downtown - Morning Drive	vifIDKDrfq4	0.6
Miami 4K - Singapore Of The US - Sunset Drive	ASaXDIDStG4	1
Ibiza Spain 4K - Driving Downtown - Night Drive	XQNwk_ajmW4	1
Ibiza 4K - Island Road Trip - Scenic Drive	uSr1Tz1I9IE	0.9
Barcelona 4K - Driving Downtown - Mediterranean Metropolis	VaSFsM3s5bI	1.1
Rome 4K - Night Drive	ebxiasWyeBw	0.5
Italian Riviera 4K - Yachts & Seaside Resorts - Scenic Drive	7NSGFFb_YJs	2.2
Monaco 4K - Billionaires' Playground - Sunset Drive	ij6xccYYIuE	0.5
Basel Switzerland 4K - Morning Drive - Driving Downtown	xnOipFdTGFU	0.8
Zurich Switzerland 4K - Sunset Drive	WVggB714jqU	0.8
Milan Italy 4K - Morning Drive - Driving Downtown	408tDCkG4ZE	0.7
Rome 4K - Morning Drive - Driving Downtown	ytiM1nMv_xU	1
Geneva Switzerland 4K - Driving Downtown	w4rKX6uRT5I	1.1
Las Vegas 4K - America's Playground - Skyline Sunrise	PdMrwVxkt5I	0.4
Malibu 4K - Mountains & Canyons - Ferrari F8 Spider 2021 - Scenic Drive	91c_RCvPka0	0.6
Los Angeles 4K - Sunset Drive - USA	cdXzojwKorg	0.9
Seattle 4K - Sunset Drive - USA	1ObALKmvLTE	0.7
Malibu 4K - Ferrari F8 Spider 2021 - Scenic Drive	avTBYK-snOU	0.9
Los Angeles 4K - Ferrari F8 Spider 2021 - Night Drive	_gJe9JPgwLM	0.7
California Coast 4K - Sunset Drive - Big Sur	VA9q5nG8OcM	0.5
Daytona Beach 4K - Scenic Drive	kGy6ofm_37A	0.5
Florida 4K - Sunshine Skyway - Scenic Drive	Mur_1O3ckyA	1.3
Tampa 4K - Night Drive	26_9x6sEj2Y	0.8
Orlando 4K - Night Drive	5vUF7hbhiAs	0.9
Washington DC 4K - Driving Downtown	luHFgP5ep04	0.8
Atlantic City 4K - Driving Downtown - Little Las Vegas	PGxEADeE9W8	0.5
Washington DC 4K - Sunset Drive	vOZ4TzhAmLs	0.7
New York City 4K - Night Drive	UPrPATfWJ2g	0.9
New York City 4K - Midtown Manhattan Drive	MicJhaZ7zeY	1.1
Philadelphia 4K - Driving Downtown - USA	6lXWYkzVx7E	0.9
Philadelphia 4K - Winter Night Drive	BBmRgmGNf7A	0.7
Boston 4K - Winter Weekend Drive	zxz4pFSJugY	1.2
Brooklyn 4K - Night Drive	yhCAWZlv_Sc	0.4
New York City 4K - Sunset Drive	LQLJu-EpkeE	0.9
New York City 4K - Skyline Highway Drive	gBsHxC-_LoU	0.5
Boston 4K - Night Drive - USA	EQ9Rm43jGpw	1
Dubai 4K - Skyline Expressway Sunrise - Driving Downtown	Rl3zyHDjSIs	1.3
Cairo Egypt 4K - Rush Hour - Driving Downtown	Esyp2P0uJu4	1.6
Istanbul Turkey 4K - Coastal Night Drive	aTsG9KK_Mkk	0.7
Utah 4K - Desert Snow - Scenic Drive - USA	BlMPjhL4jqg	1.1
Park City Utah 4K - Sundance Ski Town - Scenic Drive	ZY7Oz6CrLTo	1
Salt Lake City 4K - Night Drive - USA	93D6qxMlk7g	0.6
Arches National Park 4K - Winter Sunrise - Scenic Drive - USA	87jnG5pO230	1.3
Aspen 4K - Hollywood's Ski Resort - Scenic Drive - USA	shP1PLHY_6o	0.6
Grand Teton National Park 4K - Scenic Drive - Wyoming USA	SeXcCz_mTcg	1.3
Jackson Hole 4K - Wyoming's Billionaire Wilderness - Scenic Drive	xBWeFV9wAK0	0.5
USA Ski Country 4K - Colorado Scenic Drive	ZluHUNIw8-o	1.2
Breckenridge 4K - Swiss Alpine Ski Town - Scenic Drive - USA	EuEfQVirnf8	0.4
Denver 4K - Mile High City - Driving Downtown	mj-EcEg03_A	0.5
Cairo 4K - Pyramid Expressway Sunrise - Scenic Drive	7skHUIkbQac	0.4
Miami 4K - Vice City - Driving Downtown	drt8bDQ49b4	1.1
Rio De Janeiro 4K - Miami Beach of South America	l8geG89VAMY	1.5
Istanbul 4K - Night Drive - Turkey	bNEGEb_YtmU	1.1
Dubai 4K - Night Drive - Desert Metropolis	gAejektGusM	1.5
Istanbul 4K - Driving Downtown - Turkey	RKIPWCWldzE	1.5
Cairo 4K - Night Drive - Driving Downtown	86pZTI5gJQM	1
Cairo 4K - Driving Downtown - Egypt	--I-TdCe2_g	0.7
Dubai 4K - Miami of the Middle East - Morning Drive	ta6bRf4MqNo	0.8
Dubai 4K - Driving Downtown - Skyscraper Sunset	TE2tfavIo3E	1.3
California Coast 4K - Scenic Drive	q52pS_RtcXo	0.6
Las Vegas 4K - Midnight Drive	HZaLvgP-R8E	1.3
Bryce Canyon National Park 4K - Scenic Drive - Utah USA	xsW00gX-KMs	0.8
Arches National Park 4K - Scenic Drive - Utah USA	l-xaEoKGIxY	1
Florida Keys 4K - Tropical Islands - Scenic Drive	KDrVpkbwcbg	1.6
Palm Beach 4K - Mar-a-Lago Billionaire Resort - Scenic Drive	znNVVV2uezc	1.1
Miami 4K - Gold Coast - Scenic Drive	xj7abSp07w0	1.7
Zion National Park 4K - Scenic Drive - Utah USA	ydvsyAZbuSQ	0.9
Las Vegas 4K - Sunset Drive	X9U5DafT0d4	1
Miami 4K - Night Drive	Cod_ggrs69U	1.1
Los Angeles 4K - Central Park	FKUbIhpBRkI	0.7
Los Angeles 4K - Pacific Coast Highway - Scenic Drive	nJuonVtyLWk	0.8
Napa Valley 4K - California Vineyards - Scenic Drive	fZqP89ro0ro	1.2
Los Angeles 4K - Skyscraper Metropolis - Wilshire Boulevard	zfblxgasy-0	1.1
Los Angeles 4K - Night Drive	8ziL3gjSA5Y	0.9
San Francisco 4K - Pacific Coast Highway - Scenic Drive	l72z2l_1h9A	2.3
San Francisco 4K - Night Drive	jJ08h2cgWjI	0.7
Hollywood 4K - Night Drive	FOlPJiqGwHk	0.8
San Francisco 4K - Driving Downtown	E7t3QyEfyLA	1.2
California Wine Country 4K - Scenic Drive	BQjavqQqi-0	1.3
Beverly Hills 4K - Driving Downtown - USA	Up_hd5OwytE	0.7
Malibu 4K - Sunset Drive - Billionaire's Beach	AxQXXaZbT-I	0.7
Charleston 4K - Sunset Drive - South Carolina USA	pW6PyaQz_PI	0.6
Charlotte 4K - Driving Downtown - North Carolina USA	9d_NEyixBYQ	0.7
Atlanta 4K - Driving Downtown - Georgia USA	xbqsvhcyu_Y	1.1
Tokyo 4K - Classic Tokyo Neighborhood - Japan	d115_8Wjpbg	0.6
Tokyo 4K - Driving Downtown - Central Tokyo - Japan	3waBgn_N22c	0.9
Sao Paulo 4K - Night Drive	WcjGyIjHLDA	0.7
Buenos Aires 4K - Driving Downtown - Morning Drive	-TPJot7-HTs	0.8
Lima 4K - Driving Downtown - Peru	dk-NdzCrxvw	1.1
Chicago 8K 360° Video - Virtual Reality - Driving Downtown	Gu1D3BnIYZg	0.2
Hong Kong 4K - Night Drive - Driving Downtown	XaR6qEt-BIY	0.8
Bangkok 4K - Driving Downtown - Thailand	GuyazY5xtuI	1.1
Santiago 4K - Driving Downtown - Chile	VMEsuZRIYs0	0.8
Sao Paulo 4K - Driving Downtown - Brazil	Ic2ERD7kt4o	1.1
Rio 4K - City Center - Night Drive	fG_idt30MZA	1.2
Singapore 4K - Skyscraper District - Sunset Drive	AEgrx3Uxfts	0.8
Lima 4K - Malibu and Santa Monica in South America - Peru	trKeUE41KVY	1
Rio 4K - Copacabana Beach - Morning Drive	_hWCN1yV9TY	0.5
Sao Paulo 4K - Modern City Center - Driving Downtown - Brazil	39eKuBwiOv0	1.1
Rio De Janeiro 4K - 2AM Airport Drive - Brazil	KKeVvM_VtwM	0.6
Santiago 4K - Sunset Drive - Chile	g63DvTXrk_E	0.8
Buenos Aires 4K - Night Drive - Driving Downtown	75X9vSFCh14	1.4
Sao Paulo 4K - City Sunrise - Driving Downtown - Brazil	_hptbEVx5eM	1
Tokyo 4K - Shibuya Crossing - Driving Downtown	ZobYWO8JqpY	0.5
Paris 4K - Classic Paris Streets - Driving Downtown	AdqE7mFQ7Y4	0.6
Tokyo 4K - Skyscraper District - Morning Drive - Shinjuku	K830yXMiFkY	0.5
Hong Kong 4K - Morning Skyline Views - Driving Downtown	ULcuZ3Q02SI	0.5
Toronto 4K - Sunset Drive - Driving Downtown	Zbm0Z6nw5sE	1.2
Singapore 4K - Night Drive - Driving Downtown	WHX2yx1FD-w	1
Chicago 4K - Sunset Drive - Driving Downtown	3ma3yXXc3V8	1.3
Tokyo 4K - Driving Downtown - Japan 東京 日本	01E_6NfmQ10	1.1
Bangkok 4K - Skyline Expressway Sunrise - Driving Downtown	3xTbO0NSuNo	0.6
Bangkok 4K - Driving Downtown - World's #1 Visited City	4BmxX6Ipxpo	0.6
Tokyo 4K - Skyline Expressway Sunrise - Rainbow Bridge - Driving Downtown	B8Yyf6WKgaM	0.4
America's Most Visited National Park! - Fall Colors - Great Smoky Mountains 4K - Scenic Drive	Of5pGj6Obzo	1.5
Singapore 4K - Driving Downtown - Morning Drive	IpEpTWIDL4Q	1.2
Tokyo 4K - Beverly Hills of Japan - Driving Downtown - Ginza	ceEE_oYuzS4	0.2
Tokyo 4K - 2020 Olympics Host - Driving Downtown	z1obnaqPgMA	0.7
Hong Kong 4K - Morning Drive - Protests Aftermath	qWL3Vw7d7bM	0.5
Hong Kong 4K - Skyscraper Sunset - Driving Downtown	V8nBZbbJePs	0.6
London 4K - West End Drive - Driving Downtown - England	H41mBDFrZL8	0.8
New York City 4K - Brooklyn Skyscraper Drive	aeB020VZSFY	0.6
Chicago 4K - Chicago's Main Street - Driving Downtown - The Magnificent Mile	wdIu8XdqtWM	0.5
London 4K - Royal Kensington - Driving Downtown	fV22kGkqxvc	0.6
Gulf Coast 4K - Scenic Drive - Coastal Sunrise	8SVyB8gNxbg	0.8
Austin 4K - Downtown Skyscraper Drive - USA	VKouHxAtC5E	1
Texas 4K - Sunrise Drive - Scenic Drive - USA	Aw51cEQ7Mr0	1
New Orleans 4K - World's Longest Bridge - Lake Pontchartrain Causeway	VTMOrwQx99M	0.4
Boston 4K - Skyscraper District - Driving Downtown	aVaQkKBEvzE	1
Skyscraper Sunset - Mexico City 4K - Driving Downtown	JCXH_WyC8A4	0.8
